# Supplementary material
Source: MDPI journal article supplement (https://www.mdpi.com/2311-5637/10/1/29)
Supplement: s1 [file s1]

**Table S1.** Origin of the NSC and LNSC bacterial isolates picked out from the 10-fold dilution of the respective media.

| Species isolated                                            | M17 30 °C      |                | M17 45 °C      |                | MRS            |                | FH             |                | KAA            |                |
|-------------------------------------------------------------|----------------|----------------|----------------|----------------|----------------|----------------|----------------|----------------|----------------|----------------|
|                                                             | NSC            | LNSC           |
|                                                             | dilution<br>-5 | dilution<br>-6 | dilution<br>-5 | dilution<br>-6 | dilution<br>-5 | dilution<br>-6 | dilution<br>-3 | dilution<br>-5 | dilution<br>-4 | dilution<br>-5 |
| <i>Enterococcus durans</i>                                  | n.i.           | 14             | n.i.           | 10             | n.i.           | 1              | n.i.           | n.i.           | n.i.           | n.i.           |
| <i>Enterococcus faecium</i>                                 | n.i.           | 4              | n.i.           | 1              | n.i.           | 17             | n.i.           | n.i.           | 10             | n.i.           |
| <i>Enterococcus faecalis</i>                                | n.i.           | 2              | n.i.           | n.i.           | n.i.           | n.i.           | n.i.           | n.i.           | 1              | n.i.           |
| <i>Streptococcus gallolyticus</i> subsp. <i>macedonicus</i> | 4              | 4              | 9              | n.i.           |
| <i>Streptococcus equinus</i>                                | 7              | n.i.           | 2              | n.i.           | 4              | n.i.           | n.i.           | n.i.           | n.i.           | n.i.           |
| <i>Streptococcus lutetiensis</i>                            | 1              | n.i.           | n.i.           | 3              | 1              | n.i.           | n.i.           | n.i.           | n.i.           | n.i.           |
| <i>Streptococcus oralis</i>                                 | n.i.           | n.i.           | 1              | 2              | n.i.           | n.i.           | n.i.           | n.i.           | n.i.           | n.i.           |
| <i>Streptococcus salivarius</i>                             | n.i.           | 1              | n.i.           |
| <i>Lactocaseibacillus paracasei</i>                         | n.i.           | n.i.           | n.i.           | n.i.           | n.i.           | n.i.           | 12             | 23             | n.i.           | n.i.           |

NSC, natural starter culture; LNSC, liophylised NSC; n.i., not isolated from this medium
