# Supplementary material
Source: MDPI journal article supplement (https://www.mdpi.com/2311-5637/10/1/29)
Supplement: s1 [file s1]

**Table S3.** Breakpoints used for the safety evaluation of non-QPS microorganisms.

| Species                                                     | PEN               | AMP              | AZI              | ERY               | FEP            | FOT            | AXO            | CHL            | CLI               | ETP            | MERO              | LEVO           | LZD            | TET             | TGC               | VAN            | TEI            | SYN            | CIP            |
|-------------------------------------------------------------|-------------------|------------------|------------------|-------------------|----------------|----------------|----------------|----------------|-------------------|----------------|-------------------|----------------|----------------|-----------------|-------------------|----------------|----------------|----------------|----------------|
| <i>Enterococcus durans</i>                                  | n.t.              | 4 <sup>1</sup>   | n.g.             | 0,5 <sup>2</sup>  | n.g.           | n.g.           | n.g.           | 8 <sup>2</sup> | n.g.              | n.g.           | n.g.              | n.g.           | 4 <sup>1</sup> | 16 <sup>2</sup> | 0,25 <sup>1</sup> | 2 <sup>1</sup> | 2 <sup>1</sup> | n.g.           | 4 <sup>1</sup> |
| <i>Enterococcus faecium</i>                                 | n.t.              | 4 <sup>1</sup>   | n.g.             | 0,5 <sup>2</sup>  | n.g.           | n.g.           | n.g.           | 8 <sup>2</sup> | n.g.              | n.g.           | n.g.              | n.g.           | 4 <sup>1</sup> | 16 <sup>2</sup> | 0,25 <sup>1</sup> | 2 <sup>1</sup> | 2 <sup>1</sup> | 1 <sup>1</sup> | 4 <sup>1</sup> |
| <i>Enterococcus faecalis</i>                                | n.t.              | 4 <sup>1</sup>   | n.g.             | 0,5 <sup>2</sup>  | n.g.           | n.g.           | n.g.           | 8 <sup>2</sup> | n.g.              | n.g.           | n.g.              | n.g.           | 4 <sup>1</sup> | 16 <sup>2</sup> | 0,25 <sup>1</sup> | 2 <sup>1</sup> | 2 <sup>1</sup> | n.g.           | 4 <sup>1</sup> |
| <i>Streptococcus gallolyticus</i> subsp. <i>macedonicus</i> | 0,12 <sup>2</sup> | 0,5 <sup>1</sup> | 0,5 <sup>2</sup> | 0,25 <sup>2</sup> | 1 <sup>2</sup> | 1 <sup>2</sup> | 1 <sup>2</sup> | 4 <sup>2</sup> | 0,25 <sup>2</sup> | 1 <sup>2</sup> | 0,25 <sup>2</sup> | 2 <sup>2</sup> | 2 <sup>2</sup> | 2 <sup>2</sup>  | n.g.              | 1 <sup>2</sup> | n.g.           | n.g.           | n.g.           |
| <i>Streptococcus equinus</i>                                | 0,12 <sup>2</sup> | 0,5 <sup>1</sup> | 0,5 <sup>2</sup> | 0,25 <sup>2</sup> | 1 <sup>2</sup> | 1 <sup>2</sup> | 1 <sup>2</sup> | 4 <sup>2</sup> | 0,25 <sup>2</sup> | 1 <sup>2</sup> | 0,25 <sup>2</sup> | 2 <sup>2</sup> | 2 <sup>2</sup> | 2 <sup>2</sup>  | n.g.              | 1 <sup>2</sup> | n.g.           | n.g.           | n.g.           |
| <i>Streptococcus lutetiensis</i>                            | 0,12 <sup>2</sup> | 0,5 <sup>1</sup> | 0,5 <sup>2</sup> | 0,25 <sup>2</sup> | 1 <sup>2</sup> | 1 <sup>2</sup> | 1 <sup>2</sup> | 4 <sup>2</sup> | 0,25 <sup>2</sup> | 1 <sup>2</sup> | 0,25 <sup>2</sup> | 2 <sup>2</sup> | 2 <sup>2</sup> | 2 <sup>2</sup>  | n.g.              | 1 <sup>2</sup> | n.g.           | n.g.           | n.g.           |
| <i>Streptococcus oralis</i>                                 | 0,12 <sup>2</sup> | 0,5 <sup>1</sup> | 0,5 <sup>2</sup> | 0,25 <sup>2</sup> | 1 <sup>2</sup> | 1 <sup>2</sup> | 1 <sup>2</sup> | 4 <sup>2</sup> | 0,25 <sup>2</sup> | 1 <sup>2</sup> | 0,25 <sup>2</sup> | 2 <sup>2</sup> | 2 <sup>2</sup> | 2 <sup>2</sup>  | n.g.              | 1 <sup>2</sup> | n.g.           | n.g.           | n.g.           |
| <i>Streptococcus salivarius</i>                             | 0,12 <sup>2</sup> | 0,5 <sup>1</sup> | 0,5 <sup>2</sup> | 0,25 <sup>2</sup> | 1 <sup>2</sup> | 1 <sup>2</sup> | 1 <sup>2</sup> | 4 <sup>2</sup> | 0,25 <sup>2</sup> | 1 <sup>2</sup> | 0,25 <sup>2</sup> | 2 <sup>2</sup> | 2 <sup>2</sup> | 2 <sup>2</sup>  | n.g.              | 1 <sup>2</sup> | n.g.           | n.g.           | n.g.           |

AMP, Ampicillin; PEN, Penicillin; AZI, Azithromycin; ERY, Erythromycin; FEP, Cefepime; FOT, Cefotaxime; AXO, Ceftriaxone; CHL, Chloramphenicol; CLI, Clindamycin; ETP, Ertapenem; MERO, Meropenem; LEVO, Levofloxacin; LZD, Linezolid; TET, Tetracycline; TGC, Tigecycline; VAN, Vancomycin; TEI, Teicoplanin; SYN, Quinupristin/Dalfopristin; CIP, Ciprofloxacin; S, sensitive; R, resistant; I, intermediate; n.t., not tested; n.g, breakpoint not given by EUCAST and CLSI.

<sup>1</sup> Breakpoint by EUCAST 2023.

<sup>2</sup> Breakpoint by CLSI 2020.
