# Supplementary material
Source: MDPI journal article supplement (https://www.mdpi.com/2311-5637/10/1/29)
Supplement: s1 [file s1]

**Table S2.** Molecular primers used for antibiotic resistance genes and virulence genes detection.

| Marker gene                  | Primer                         | Gene target       | Primer sequence (5'–3')                                | Annealing (°C) | Size (bp) | Reference |
|------------------------------|--------------------------------|-------------------|--------------------------------------------------------|----------------|-----------|-----------|
| Glycosyl hydrolase           | hylEfm-F<br>hylEfm-R           | <i>hylEfm</i>     | GAGTAGAGGAATATCTTAGC<br>AGGCTCCAATTCTGT                | 50             | 661       | [50]      |
| Cell wall-associated protein | TE34<br>TE36                   | <i>esp</i>        | TTGCTAATGCTAGTCCACGACC<br>GCGTCAACACTTGCATTGCCGAA      | 56             | 933       | [51]      |
| Insertion element IS16       | IS16-F<br>IS16-R               | <i>IS16</i>       | CATGTTCCACGAACCAGAG<br>TCAAAAAGTGGGCTTGGC              | 53             | 547       | [52]      |
| C5a-peptidase                | scpB-F<br>scpB-R               | <i>scpB</i>       | AGCCATATGCTGCGATCTCT<br>GGGTTGAACCAAGTGTGCTT           | 58             | 198       | [53]      |
| Hyaluronate lysase           | hly-F<br>hly-R                 | <i>hlyB</i>       | TCCATTAAAGCCCTTGGTG<br>GGCGCCAGTATAAGCAACAT            | 58             | 199       | [53]      |
| $\alpha$ C-protein           | bca-F<br>bca-R                 | <i>bca</i>        | TAACAGTTATGATACTTCACAGAC<br>ACGACTTTCCTCCGTCCACTTAGG   | 58             | 535       | [54]      |
| $\beta$ C-protein            | bac-F<br>bac-R                 | <i>bac</i>        | CTATTTTGATATTGACAATGCAA<br>GTCGTTACTTCCTTGAGATGTAAC    | 58             | 592       | [54]      |
| Antiphagocytic M protein     | emm-F<br>emm-R                 | <i>emm</i>        | TATTCGCTTAGAAAATTAA<br>GCAAGTTCCTCAGCTTGTTT            | 58             | variable  | [55]      |
| Mitogenic exotoxin Z         | smeZ-F<br>smeZ-R               | <i>smeZ</i>       | CTTCAATATTCATTGCAATAATTTC<br>TGTAAGTGTGTTTTGTTAGTTGAT  | 58             | 400       | [55]      |
| Pyrogenic exotoxin A         | speA-F<br>speA-R               | <i>speA</i>       | ATGGAAAACAATAAAAAAGTATTG<br>TTACTTGGTGTTAGGTAGACTTC    | 58             | 755       | [56]      |
| Pyrogenic exotoxin G         | speG-F<br>speG-R               | <i>speG</i>       | TGTATCTTTAGGGATTACTGATCAG<br>CTCGACCTAAAAGCTTATCATCCTT | 58             | 389       | [55]      |
| Streptococcal superantigen   | ssa-F<br>ssa-R                 | <i>ssa</i>        | TCCACAGGTCAGCTTTTACAG<br>TGATCAAATATTGCTCCAGGTG        | 58             | 502       | [56]      |
| Macrolides                   | mef(A)-F<br>mef(A)-R           | <i>mef(A)</i>     | AGTATCATTAACTACTAGTGC<br>TTCTTCTGGTACTAAAAGTGG         | 55             | 328       | [32]      |
|                              | ERMAF/Tn554-2<br>ERMAR/Tn544-1 | <i>erm(A)</i>     | TCAAAGCCTGTCGGAATTGG<br>AAGCGGTAAACCCCTCTGAG           | 58             | 440       | [57]      |
|                              | ermB-1<br>ermB-2               | <i>erm(B)</i>     | CATTTAACGACGAAACTGGC<br>GGAACATCTGTGGTATGGCG           | 55             | 405       | [58]      |
|                              | ErmCF/ermC-1<br>ErmCR/ermC-2   | <i>erm(C)</i>     | ATCTTTGAAATCGGCTCAGG<br>CAAACCCGTATTCCACGATT           | 58             | 295       | [57]      |
| Lincosamides                 | lnu(C)-F<br>lnu(C)-R           | <i>lnu(C)</i>     | AATTTGCAATAGATGCGGAGA<br>TCATGTGCATTTTCATCA            | 55             | 400       | [59]      |
| Tn916-like transposase       | Tn916-like-F                   | <i>Tn916-like</i> | GCCATGACCTATCTTATA                                     | 51             | 476       | [60]      |

---

Tn916-like-R

CTAGATTGCGTCAA

---

N = A, C, G, and T; R = A and G; W = A and T; Y = C and T
